# Supplementary material
Source: publisher site journal article supplement (https://www.dovepress.com/article/477118)
Supplement: Supplementary file 1 [file get_supplementary_file.php]

**Supplementary data:**


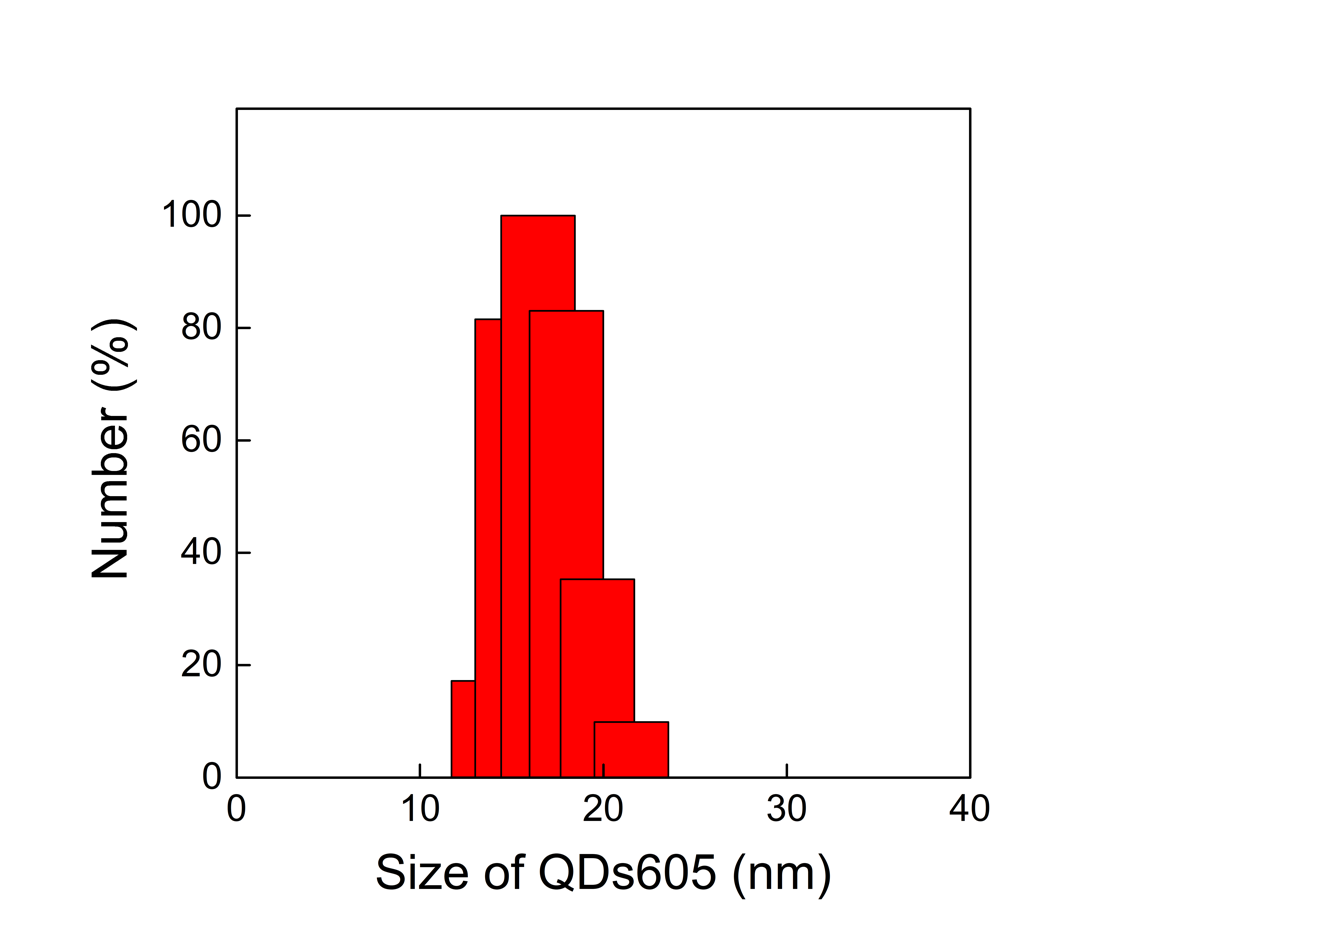


**Supplemental Figure 1.** Quantum dot conjugate size registration with Edinburgh spectrometer. Excitation slit: 15nm; Emission slit: 15nm; Excitation 405 nm. Size distribution measured with dynamic light scattering.


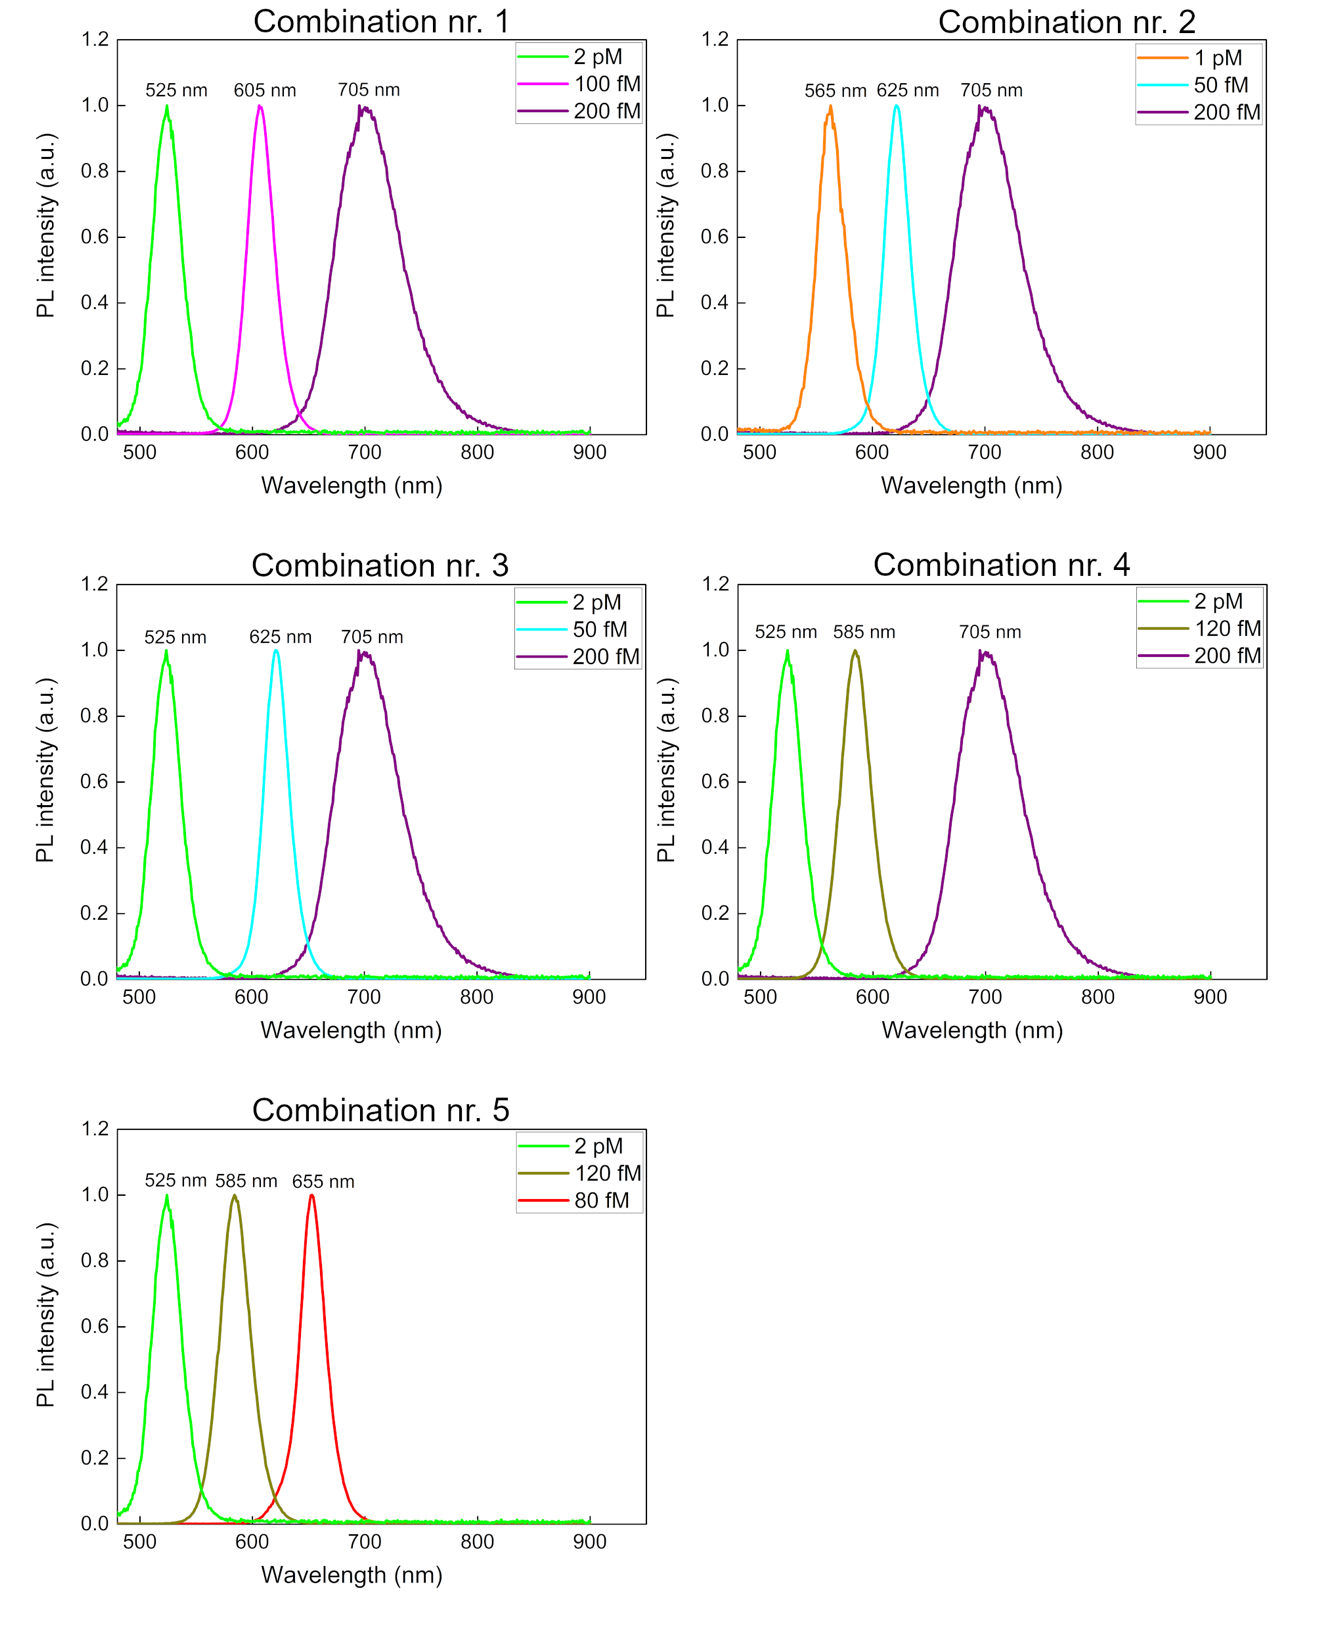


**Supplemental Figure 2.** Five different fluorescence spectra combinations that could be applied for multiplexed detection using three QDs, spectra ranging between 525 nm and 705 nm Detection with Edinburgh spectrometer, 405nm excitation wavelength.


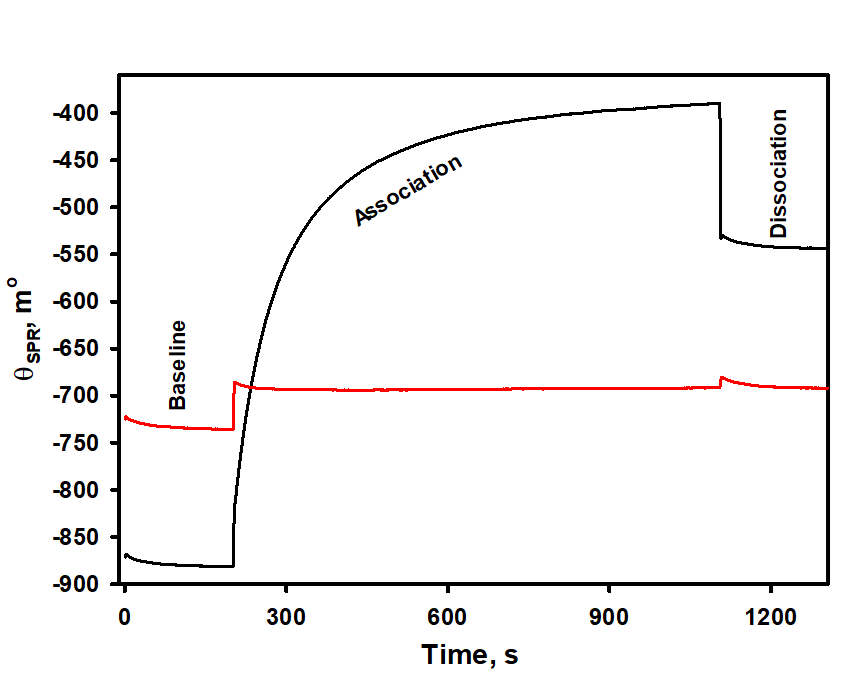


**Supplemental figure 3.** Real-time SPR sensograms recorded during the interaction of immobilized biotinylated anti-COMP 17C10 antibodies with streptavidin-coated QD625 in the first channel of the SPR cuvette (black line) and the non-specific interaction of immobilized anti-COMP 17C10 antibodies with streptavidin-coated QD625 in the second channel of the SPR cuvette (red line). Experimental conditions: 200.46 nM biotinylated anti-COMP 17C10 antibodies and 200.46 nM anti-COMP 17C10 antibodies in 10 mM sodium acetate buffer (pH 4.5), 20.0 nM streptavidin-coated QD625 in 10 mM PBS (pH 7.4).
